# Supplementary material for: An Asymmetrically Balanced Organization of Kinases versus Phosphatases across Eukaryotes Determines Their Distinct Impacts
Source: PLoS Comput Biol. 2017 Jan 30;13(1):e1005221. doi: 10.1371/journal.pcbi.1005221 (PMC5279721; doi:10.1371/journal.pcbi.1005221)
Supplement: S1 Table — (XLSX) [file pcbi.1005221.s008.xlsx]

## Sheet: supplementaryTable1
Table S1. A listing of kinases and phosphatases in budding yeast and the association of kinases to layers in the impact hierarchy (related to Figure 3).
Gene Common Name	ORF	Kinase Layer	Inactivated	Detected
ALK1	YGL021W	Top	1	0
ARK1	YNL020C	Top	1	0
BUB1	YGR188C	Top	1	0
BUD32	YGR262C	Top	1	0
CDC15	YAR019C	Top	1	1
CHK1	YBR274W	Top	1	1
CKA1	YIL035C	Top	1	0
CKA2	YOR061W	Top	1	1
CTK1	YKL139W	Top	1	1
ELM1	YKL048C	Top	1	1
FUS3	YBL016W	Top	1	0
HRR25	YPL204W	Top	1	1
IME2	YJL106W	Top	1	0
KDX1	YKL161C	Top	1	0
KIN4	YOR233W	Top	1	1
KNS1	YLL019C	Top	1	1
MKK1	YOR231W	Top	1	0
MKK2	YPL140C	Top	1	0
NNK1	YKL171W	Top	1	1
PHO85	YPL031C	Top	1	0
PKP1	YIL042C	Top	1	0
PKP2	YGL059W	Top	1	0
PRR2	YDL214C	Top	1	1
PSK2	YOL045W	Top	1	0
PTK1	YKL198C	Top	1	0
SAT4	YCR008W	Top	1	0
SKS1	YPL026C	Top	1	0
SMK1	YPR054W	Top	1	0
SNF1	YDR477W	Top	1	1
SSN3	YPL042C	Top	1	0
TOR1	YJR066W	Top	1	1
TPK1	YJL164C	Top	1	1
TPK2	YPL203W	Top	1	0
TPK3	YKL166C	Top	1	1
VHS1	YDR247W	Top	1	0
VPS15	YBR097W	Top	1	0
VPS34	YLR240W	Top	1	0
YGK3	YOL128C	Top	1	0
AKL1	YBR059C	Middle	1	1
BCK1	YJL095W	Middle	1	1
CBK1	YNL161W	Middle	1	1
CDC28	YBR160W	Middle	1	1
CLA4	YNL298W	Middle	1	1
DBF20	YPR111W	Middle	1	1
FRK1	YPL141C	Middle	1	1
HAL5	YJL165C	Middle	1	1
HSL1	YKL101W	Middle	1	1
KIN2	YLR096W	Middle	1	1
MCK1	YNL307C	Middle	1	1
PBS2	YJL128C	Middle	1	1
PKH2	YOL100W	Middle	1	1
PKH3	YDR466W	Middle	1	1
PRK1	YIL095W	Middle	1	1
PSK1	YAL017W	Middle	1	1
PTK2	YJR059W	Middle	1	1
RIM11	YMR139W	Middle	1	1
RTK1	YDL025C	Middle	1	1
SKM1	YOL113W	Middle	1	1
SKY1	YMR216C	Middle	1	1
SSK2	YNR031C	Middle	1	1
TDA1	YMR291W	Middle	1	1
TEL1	YBL088C	Middle	1	1
YCK1	YHR135C	Middle	1	1
YPK1	YKL126W	Middle	1	1
CMK1	YFR014C	Bottom	1	1
CTK3	YML112W	Bottom	0	1
FPK1	YNR047W	Bottom	0	1
GCN2	YDR283C	Bottom	1	1
GIN4	YDR507C	Bottom	0	1
HOG1	YLR113W	Bottom	1	1
HRK1	YOR267C	Bottom	1	1
IPL1	YPL209C	Bottom	0	1
KIN1	YDR122W	Bottom	1	1
KIN82	YCR091W	Bottom	1	1
KKQ8	YKL168C	Bottom	1	1
KSP1	YHR082C	Bottom	1	1
NPR1	YNL183C	Bottom	0	1
PKH1	YDR490C	Bottom	0	1
PRR1	YKL116C	Bottom	1	1
RCK2	YLR248W	Bottom	1	1
RIM15	YFL033C	Bottom	0	1
SCH9	YHR205W	Bottom	0	1
SCY1	YGL083W	Bottom	0	1
SGV1	YPR161C	Bottom	1	1
SIP1	YDR422C	Bottom	0	1
SIP2	YGL208W	Bottom	0	1
SLN1	YIL147C	Bottom	0	1
STE20	YHL007C	Bottom	0	1
YAK1	YJL141C	Bottom	0	1
YCK3	YER123W	Bottom	0	1
YPK2	YMR104C	Bottom	1	1
YPL150W	YPL150W	Bottom	1	1
ALK2	YBL009W	Outgroup	1	0
ATG1	YGL180W	Outgroup	1	1
CAK1	YFL029C	Outgroup	0	0
CDC5	YMR001C	Outgroup	0	0
CDC7	YDL017W	Outgroup	0	0
CMK2	YOL016C	Outgroup	1	0
COQ8	YGL119W	Outgroup	0	0
CTK2	YJL006C	Outgroup	0	0
DBF2	YGR092W	Outgroup	0	0
DUN1	YDL101C	Outgroup	1	1
FMP48	YGR052W	Outgroup	0	0
GAL83	YER027C	Outgroup	0	0
IKS1	YJL057C	Outgroup	0	1
IRE1	YHR079C	Outgroup	0	0
ISR1	YPR106W	Outgroup	1	0
KCC4	YCL024W	Outgroup	0	1
KIC1	YHR102W	Outgroup	0	1
KIN28	YDL108W	Outgroup	1	1
KIN3	YAR018C	Outgroup	0	0
KSS1	YGR040W	Outgroup	1	0
MEC1	YBR136W	Outgroup	0	0
MEK1	YOR351C	Outgroup	1	0
MPS1	YDL028C	Outgroup	1	0
MRK1	YDL079C	Outgroup	1	0
PAN3	YKL025C	Outgroup	0	0
PKC1	YBL105C	Outgroup	0	1
RAD53	YPL153C	Outgroup	0	0
RCK1	YGL158W	Outgroup	0	0
RIO1	YOR119C	Outgroup	1	0
RIO2	YNL207W	Outgroup	0	0
SAK1	YER129W	Outgroup	1	1
SLT2	YHR030C	Outgroup	1	0
SNF4	YGL115W	Outgroup	0	0
SPS1	YDR523C	Outgroup	1	0
SSK22	YCR073C	Outgroup	0	1
STE11	YLR362W	Outgroup	1	0
STE7	YDL159W	Outgroup	0	0
SWE1	YJL187C	Outgroup	1	1
TOR2	YKL203C	Outgroup	0	0
TOS3	YGL179C	Outgroup	1	0
YCK2	YNL154C	Outgroup	1	1
YPK3	YBR028C	Outgroup	1	1
YPL236C	YPL236C	Outgroup	1	0
CDC14	YFR028C	Phosphatase	0	1
CMP2	YML057W	Phosphatase	1	1
CNA1	YLR433C	Phosphatase	1	0
CNB1	YKL190W	Phosphatase	0	0
DCR2	YLR361C	Phosphatase	0	0
FCP1	YMR277W	Phosphatase	0	1
GLC7	YER133W	Phosphatase	0	1
LTP1	YPR073C	Phosphatase	1	1
MIH1	YMR036C	Phosphatase	0	1
MSG5	YNL053W	Phosphatase	0	1
NEM1	YHR004C	Phosphatase	0	0
OCA1	YNL099C	Phosphatase	1	0
OCA6	YDR067C	Phosphatase	0	0
PHO13	YDL236W	Phosphatase	0	0
PPG1	YNR032W	Phosphatase	1	0
PPH21	YDL134C	Phosphatase	1	0
PPH22	YDL188C	Phosphatase	1	1
PPH3	YDR075W	Phosphatase	1	0
PPQ1	YPL179W	Phosphatase	1	0
PPS1	YBR276C	Phosphatase	1	0
PPT1	YGR123C	Phosphatase	1	0
PPZ1	YML016C	Phosphatase	1	1
PPZ2	YDR436W	Phosphatase	0	1
PSR1	YLL010C	Phosphatase	1	0
PSR2	YLR019W	Phosphatase	1	0
PSY2	YNL201C	Phosphatase	0	0
PTC1	YDL006W	Phosphatase	1	0
PTC2	YER089C	Phosphatase	0	0
PTC3	YBL056W	Phosphatase	1	0
PTC4	YBR125C	Phosphatase	1	0
PTC5	YOR090C	Phosphatase	1	0
PTC6	YCR079W	Phosphatase	1	1
PTC7	YHR076W	Phosphatase	1	0
PTP1	YDL230W	Phosphatase	1	0
PTP2	YOR208W	Phosphatase	1	0
PTP3	YER075C	Phosphatase	0	0
RTR1	YER139C	Phosphatase	0	0
RTR2	YDR066C	Phosphatase	0	0
RTS1	YOR014W	Phosphatase	0	1
SAP155	YFR040W	Phosphatase	0	1
SAP185	YJL098W	Phosphatase	0	0
SAP4	YGL229C	Phosphatase	0	0
SDP1	YIL113W	Phosphatase	1	0
SIT4	YDL047W	Phosphatase	1	0
SIW14	YNL032W	Phosphatase	1	0
SPO7	YAL009W	Phosphatase	0	0
SSU72	YNL222W	Phosphatase	0	0
TEP1	YNL128W	Phosphatase	0	0
TPD3	YAL016W	Phosphatase	0	0
YCH1	YGR203W	Phosphatase	1	0
YER134C	YER134C	Phosphatase	0	0
YMR1	YJR110W	Phosphatase	0	0
YVH1	YIR026C	Phosphatase	1	0
